# Supplementary material for: LINC01123 promotes immune escape by sponging miR-214-3p to regulate B7–H3 in head and neck squamous-cell carcinoma
Source: PubMed Central journal article supplement (PMC8814033; doi:10.1038/s41419-022-04542-0), 2022-02-03
Supplement: 41419_2022_4542_MOESM5_ESM.pdf [file 41419_2022_4542_MOESM5_ESM.pdf]

Please complete the table below to indicate the contributions of all named authors to the figures.

Figure 1:

|  |
|--|
|  |
|--|

Figure 2:

|  |
|--|
|  |
|--|

Figure 3:

|  |
|--|
|  |
|--|

Figure 4:

|  |
|--|
|  |
|--|

Figure 5:

|  |
|--|
|  |
|--|

Figure 6:

|  |
|--|
|  |
|--|

Signed for and on behalf of the Author(s):

Huan Li

Print Name:

Date:
